# Supplementary material for: Competing protonation sites in sulfadiazine: answers from chemistry and electron density
Source: Royal Society of Chemistry journal article supplement (doi:10.1039/c2ce26633d), 2012-11-21

Supporting Information for the manuscript

## Competing protonation sites in sulfadiazine: Answers from chemistry and electron density.

by Fangfang Pan, Ruimin Wang and Ulli Englert

Table S1. Data completeness for **1**

Table S2. Data completeness for **2**

Table S3. Data completeness for **3b**

Table S4. Properties of bond critical points in **1**

Table S5. Properties of bond critical points in **2**

Table S6. Properties of bond critical points in **3b**

Table S7. Integrated net charges and volumes of the atomic basins

Fig. S1: Residual electron density after the multipole refinement of **1**

Fig. S2: Residual electron density after the multipole refinement of **2**

Fig. S3: Residual electron density after the multipole refinement of **3b**

Table S8. IAM refinement results for alternative protonation patterns in **3a** and **3b**.

Fig. S4: Laplacian of the experimental charge density in **3b** for alternative protonation patterns

Table S1. Data completeness for **1**

Resolution & Completeness Statistics (Cumulative and Friedel Pairs Averaged)

| Theta                     | sin(th)/Lambda | Complete | Expected | Measured | Missing |
|---------------------------|----------------|----------|----------|----------|---------|
| 20.82                     | 0.500          | 0.999    | 1796     | 1794     | 2       |
| 23.01                     | 0.550          | 0.999    | 2400     | 2398     | 2       |
| 25.24                     | 0.600          | 0.999    | 3112     | 3110     | 2       |
| ----- ACTA Min. Res. ---- |                |          |          |          |         |
| 27.51                     | 0.650          | 0.999    | 3952     | 3950     | 2       |
| 29.84                     | 0.700          | 1.000    | 4929     | 4927     | 2       |
| 32.21                     | 0.750          | 1.000    | 6070     | 6068     | 2       |
| 34.65                     | 0.800          | 1.000    | 7368     | 7366     | 2       |
| 37.17                     | 0.850          | 1.000    | 8821     | 8819     | 2       |
| 39.77                     | 0.900          | 1.000    | 10460    | 10458    | 2       |
| 42.47                     | 0.950          | 1.000    | 12330    | 12326    | 4       |
| 45.29                     | 1.000          | 1.000    | 14384    | 14380    | 4       |
| 48.27                     | 1.050          | 0.999    | 16643    | 16630    | 13      |
| 51.43                     | 1.100          | 0.997    | 19108    | 19052    | 56      |
| 51.77                     | 1.105          | 0.992    | 19403    | 19247    | 156     |

Summary of Reflection Data in FCF - Note: Friedel Pairs Averaged

|                                |        |                                       |
|--------------------------------|--------|---------------------------------------|
| Total # of Reflections in FCF. | 19247  | (Hmax = 17, Kmax = 34, Lmax = 61) Obs |
| Number above Rep. Theta(Max) . | 0      |                                       |
| Actual Theta(Max) (Deg.) ...   | 51.767 | (Hmax = 17, Kmax = 34, Lmax = 61) Exp |
| Reported Theta(Max) (Deg.) ... | 51.770 | (Hmax = 17, Kmax = 34, Lmax = 61) Rep |
| Actual Theta(Min) (Deg.) ...   | 2.563  |                                       |
| Reported Theta(Min) (Deg.) ... | 2.560  |                                       |
| Unique (Expected) .....        | 19410  |                                       |
| Unique (in FCF) .....          | 19247  |                                       |
| Observed [I .gt. 2 Sig(I)] ... | 12933  |                                       |
| Less-Thans .....               | 6314   |                                       |
| Negative Intensities .....     | 1395   |                                       |
| Negative Intensities < - 2 SIG | 0      |                                       |
| Missing (Total) .....          | 156    |                                       |
| Missing Below Th(Min) .....    | 1      |                                       |
| Missing Th(Min) to STh/L=0.600 | 1      |                                       |
| Missing STh/L=0.600 to Th(Max) | 154    |                                       |
| Missing Very Strong Refl. .... | 0      |                                       |
| Beamstop Effected Reflections  | 0      |                                       |

Table S2. Data completeness for **2**

| Resolution & Completeness Statistics (Cumulative and Friedel Pairs Averaged) |                |          |          |          |         |
|------------------------------------------------------------------------------|----------------|----------|----------|----------|---------|
| Theta                                                                        | sin(th)/Lambda | Complete | Expected | Measured | Missing |
| 20.82                                                                        | 0.500          | 0.998    | 1118     | 1116     | 2       |
| 23.01                                                                        | 0.550          | 0.999    | 1501     | 1499     | 2       |
| 25.24                                                                        | 0.600          | 0.999    | 1927     | 1925     | 2       |
| ----- ACTA Min. Res. ----                                                    |                |          |          |          |         |
| 27.51                                                                        | 0.650          | 0.999    | 2470     | 2468     | 2       |
| 29.84                                                                        | 0.700          | 0.999    | 3067     | 3065     | 2       |
| 32.21                                                                        | 0.750          | 0.999    | 3786     | 3783     | 3       |
| 34.65                                                                        | 0.800          | 0.999    | 4591     | 4587     | 4       |
| 37.17                                                                        | 0.850          | 0.999    | 5494     | 5490     | 4       |
| 39.77                                                                        | 0.900          | 0.999    | 6551     | 6545     | 6       |
| 42.47                                                                        | 0.950          | 0.999    | 7668     | 7658     | 10      |
| 45.29                                                                        | 1.000          | 0.998    | 8973     | 8959     | 14      |
| 48.27                                                                        | 1.050          | 0.997    | 10391    | 10363    | 28      |
| 51.43                                                                        | 1.100          | 0.994    | 11937    | 11870    | 67      |
| 54.16                                                                        | 1.141          | 0.978    | 13255    | 12966    | 289     |

Summary of Reflection Data in FCF - Note: Friedel Pairs Averaged

Total # of Reflections in FCF. 12966 (Hmax = 30, Kmax = 13, Lmax = 32) Obs  
 Number above Rep. Theta(Max) . 1  
 Actual Theta(Max) (Deg.) ... 54.161 (Hmax = 30, Kmax = 13, Lmax = 32) Exp  
 Reported Theta(Max) (Deg.) ... 54.160 (Hmax = 30, Kmax = 13, Lmax = 32) Rep  
 Actual Theta(Min) (Deg.) ... 2.771  
 Reported Theta(Min) (Deg.) ... 2.770

Unique (Expected) ..... 13284  
 Unique (in FCF) ..... 12966  
 Observed [I .gt. 2 Sig(I)] ... 8707  
 Less-Thans ..... 4259  
 Negative Intensities ..... 1123  
 Negative Intensities < - 2 SIG 0

Missing (Total) ..... 289  
 Missing Below Th(Min) ..... 1  
 Missing Th(Min) to STh/L=0.600 1  
 Missing STh/L=0.600 to Th(Max) 287  
 Missing Very Strong Refl. .... 0  
 Beamstop Effected Reflections 0

Table S3. Data completeness for **3b**

| Resolution & Completeness Statistics (Cumulative and Friedel Pairs Averaged) |                |                                   |          |          |         |
|------------------------------------------------------------------------------|----------------|-----------------------------------|----------|----------|---------|
| Theta                                                                        | sin(th)/Lambda | Complete                          | Expected | Measured | Missing |
| 20.82                                                                        | 0.500          | 0.999                             | 1392     | 1391     | 1       |
| 23.01                                                                        | 0.550          | 0.999                             | 1850     | 1849     | 1       |
| 25.24                                                                        | 0.600          | 1.000                             | 2405     | 2404     | 1       |
| ----- ACTA Min. Res. ----                                                    |                |                                   |          |          |         |
| 27.51                                                                        | 0.650          | 0.998                             | 3060     | 3053     | 7       |
| 29.84                                                                        | 0.700          | 0.995                             | 3812     | 3792     | 20      |
| 32.21                                                                        | 0.750          | 0.990                             | 4689     | 4643     | 46      |
| 34.65                                                                        | 0.800          | 0.988                             | 5672     | 5603     | 69      |
| 37.17                                                                        | 0.850          | 0.984                             | 6842     | 6734     | 108     |
| 39.77                                                                        | 0.900          | 0.982                             | 8113     | 7968     | 145     |
| 42.47                                                                        | 0.950          | 0.978                             | 9549     | 9338     | 211     |
| 45.29                                                                        | 1.000          | 0.974                             | 11135    | 10844    | 291     |
| 48.27                                                                        | 1.050          | 0.969                             | 12873    | 12472    | 401     |
| 51.43                                                                        | 1.100          | 0.961                             | 14811    | 14227    | 584     |
| 54.10                                                                        | 1.140          | 0.938                             | 16455    | 15441    | 1014    |
| Summary of Reflection Data in FCF - Note: Friedel Pairs Averaged             |                |                                   |          |          |         |
| Total # of Reflections in FCF.                                               | 15441          | (Hmax = 12, Kmax = 25, Lmax = 27) | Obs      |          |         |
| Number above Rep. Theta(Max) .                                               | 1              |                                   |          |          |         |
| Actual Theta(Max) (Deg.) ...                                                 | 54.104         | (Hmax = 12, Kmax = 25, Lmax = 27) | Exp      |          |         |
| Reported Theta(Max) (Deg.) ...                                               | 54.100         | (Hmax = 12, Kmax = 25, Lmax = 27) | Rep      |          |         |
| Actual Theta(Min) (Deg.) ...                                                 | 1.903          |                                   |          |          |         |
| Reported Theta(Min) (Deg.) ...                                               | 1.900          |                                   |          |          |         |
| Unique (Expected) .....                                                      | 16453          |                                   |          |          |         |
| Unique (in FCF) .....                                                        | 15441          |                                   |          |          |         |
| Observed [I .gt. 2 Sig(I)] ...                                               | 11851          |                                   |          |          |         |
| Less-Thans .....                                                             | 3590           |                                   |          |          |         |
| Negative Intensities .....                                                   | 841            |                                   |          |          |         |
| Negative Intensities < - 2 SIG                                               | 0              |                                   |          |          |         |
| Missing (Total) .....                                                        | 1014           |                                   |          |          |         |
| Missing Below Th(Min) .....                                                  | 0              |                                   |          |          |         |
| Missing Th(Min) to STh/L=0.600                                               | 1              |                                   |          |          |         |
| Missing STh/L=0.600 to Th(Max)                                               | 1013           |                                   |          |          |         |
| Missing Very Strong Refl. ....                                               | 0              |                                   |          |          |         |
| Beamstop Effected Reflections                                                | 1              |                                   |          |          |         |

Table S4. Properties of bond critical points in **1**.  $\rho$  is the electron density,  $\nabla^2\rho$  is the Laplacian of the electron density in the bond critical point,  $D_{ij}$  the interatomic distance,  $R_{ij}$  the length of the bond path,  $d_1$  the distance from the first atom to the (3,-1) critical point and  $\lambda_1 - \lambda_3$  the eigenvalues of the Laplacian in the bond critical point.

| Compound <b>1</b> |                               |                                       |                      |                      |                   |             |             |             |
|-------------------|-------------------------------|---------------------------------------|----------------------|----------------------|-------------------|-------------|-------------|-------------|
| <b>Bond</b>       | $\rho(\text{e}/\text{\AA}^3)$ | $\nabla^2\rho(\text{e}/\text{\AA}^5)$ | $D_{ij}(\text{\AA})$ | $R_{ij}(\text{\AA})$ | $d_1(\text{\AA})$ | $\lambda_1$ | $\lambda_2$ | $\lambda_3$ |
| ZN(1)-N(5)        | 0.443(8)                      | 6.87(3)                               | 2.1747(9)            | 2.1747               | 1.0648            | -2.02       | -1.99       | 10.89       |
| ZN(1)-N(6)        | 0.406(8)                      | 5.45(4)                               | 2.1973(11)           | 2.1975               | 1.0531            | -1.71       | -1.63       | 8.79        |
| ZN(1)-N(7)        | 0.427(8)                      | 5.72(4)                               | 2.1864(13)           | 2.1865               | 1.0384            | -1.86       | -1.81       | 9.39        |
| S(1)-O(1)         | 2.45(8)                       | -15.7(5)                              | 1.4653(11)           | 1.4569               | 0.6112            | -18.97      | -17.36      | 20.64       |
| S(1)-O(2)         | 2.38(8)                       | -20.4(5)                              | 1.4663(13)           | 1.4687               | 0.636             | -17.81      | -16.68      | 14.10       |
| S(1)-N(3)         | 2.02(7)                       | -18.3(3)                              | 1.5775(12)           | 1.5836               | 0.717             | -15.14      | -12.65      | 9.54        |
| S(1)-C(5)         | 1.43(4)                       | -6.57(9)                              | 1.7597(10)           | 1.7602               | 1.0019            | -8.83       | -8.60       | 10.85       |
| O(3)-H(3O)        | 2.09(11)                      | -28.8(9)                              | 0.9830(13)           | 0.9836               | 0.7739            | -34.52      | -30.85      | 36.58       |
| N(1)-C(1)         | 2.44(7)                       | -26.5(3)                              | 1.3561(17)           | 1.3565               | 0.7955            | -21.24      | -18.23      | 12.97       |
| N(1)-C(2)         | 2.61(9)                       | -29.0(4)                              | 1.333(2)             | 1.3336               | 0.7524            | -22.99      | -20.69      | 14.67       |
| N(2)-C(1)         | 2.54(7)                       | -27.8(3)                              | 1.3505(14)           | 1.3506               | 0.7725            | -22.82      | -19.37      | 14.4        |
| N(2)-C(4)         | 2.64(7)                       | -27.3(3)                              | 1.3349(16)           | 1.3363               | 0.7286            | -23.75      | -20.56      | 17.00       |
| N(3)-C(1)         | 2.44(7)                       | -27.5(3)                              | 1.3617(15)           | 1.3629               | 0.7808            | -22.33      | -18.70      | 13.55       |
| N(4)-C(8)         | 2.42(7)                       | -29.5(3)                              | 1.3693(18)           | 1.3694               | 0.7894            | -22.50      | -19.39      | 12.40       |
| N(4)-H(4A)        | 2.18(13)                      | -33.6(10)                             | 1.01                 | 1.0101               | 0.7976            | -33.41      | -31.98      | 31.75       |
| N(4)-H(4B)        | 2.05(13)                      | -26.7(8)                              | 1.01                 | 1.0102               | 0.7516            | -27.72      | -25.07      | 26.13       |
| N(5)-C(11)        | 1.84(6)                       | -13.88(19)                            | 1.4741(15)           | 1.4743               | 0.8338            | -13.96      | -13.5       | 13.58       |
| N(5)-H(5A)        | 2.12(9)                       | -26.2(5)                              | 1.01                 | 1.0105               | 0.7425            | -27.05      | -25.85      | 26.68       |
| N(5)-H(5B)        | 2.05(9)                       | -21.9(5)                              | 1.01                 | 1.01                 | 0.7526            | -26.20      | -25.24      | 29.54       |
| N(6)-C(12)        | 1.80(7)                       | -13.96(19)                            | 1.4649(14)           | 1.4656               | 0.8325            | -13.45      | -13.03      | 12.52       |
| N(6)-H(6A)        | 1.99(9)                       | -28.6(7)                              | 1.01                 | 1.0109               | 0.7867            | -28.82      | -27.55      | 27.82       |
| N(6)-H(6B)        | 2.23(11)                      | -26.1(6)                              | 1.01                 | 1.0105               | 0.7512            | -28.98      | -27.79      | 30.64       |
| N(7)-C(13)        | 1.67(8)                       | -9.0(3)                               | 1.478(2)             | 1.4787               | 0.8483            | -12.44      | -9.85       | 13.25       |
| N(7)-H(7A)        | 1.91(10)                      | -26.8(7)                              | 1.01                 | 1.01                 | 0.795             | -27.78      | -27.21      | 28.2        |
| N(7)-H(7B)        | 2.06(11)                      | -29.9(7)                              | 1.01                 | 1.01                 | 0.775             | -28.52      | -27.98      | 26.61       |
| C(2)-C(3)         | 2.28(7)                       | -22.46(19)                            | 1.388(2)             | 1.388                | 0.7334            | -18.45      | -15.45      | 11.45       |
| C(2)-H(2)         | 2.03(15)                      | -22.8(5)                              | 1.083                | 1.0831               | 0.6953            | -20.94      | -17.98      | 16.08       |
| C(3)-C(4)         | 2.36(7)                       | -23.93(18)                            | 1.3878(18)           | 1.3879               | 0.6694            | -20.15      | -16.00      | 12.22       |
| C(3)-H(3)         | 1.99(12)                      | -19.7(3)                              | 1.083                | 1.0831               | 0.6482            | -18.08      | -16.46      | 14.85       |
| C(4)-H(4)         | 2.05(11)                      | -24.2(3)                              | 1.083                | 1.0854               | 0.6566            | -20.05      | -17.98      | 13.78       |
| C(5)-C(6)         | 2.23(6)                       | -20.97(15)                            | 1.3946(13)           | 1.3948               | 0.6903            | -18.25      | -14.91      | 12.19       |
| C(5)-C(10)        | 2.26(6)                       | -21.24(16)                            | 1.3947(15)           | 1.3950               | 0.7152            | -18.39      | -14.89      | 12.04       |
| C(6)-C(7)         | 2.24(6)                       | -22.44(17)                            | 1.3843(16)           | 1.3843               | 0.6677            | -18.55      | -14.82      | 10.93       |
| C(6)-H(6)         | 1.95(11)                      | -19.7(3)                              | 1.083                | 1.0833               | 0.6765            | -18.9       | -16.65      | 15.84       |
| C(7)-C(8)         | 2.22(7)                       | -21.07(16)                            | 1.4080(19)           | 1.4082               | 0.7087            | -19.18      | -13.63      | 11.74       |
| C(7)-H(7)         | 1.92(10)                      | -19.0(4)                              | 1.083                | 1.0833               | 0.6914            | -18.82      | -16.43      | 16.29       |
| C(8)-C(9)         | 2.18(7)                       | -21.0(3)                              | 1.4051(19)           | 1.4052               | 0.7684            | -17.24      | -14.29      | 10.5        |
| C(9)-C(10)        | 2.17(7)                       | -19.26(19)                            | 1.3914(16)           | 1.3915               | 0.647             | -17.07      | -13.55      | 11.37       |

|                             |           |            |            |        |        |        |        |       |
|-----------------------------|-----------|------------|------------|--------|--------|--------|--------|-------|
| C(9)-H(9)                   | 1.71(9)   | -14.3(3)   | 1.083      | 1.0832 | 0.7112 | -16.47 | -14.61 | 16.80 |
| C(10)-H(10)                 | 1.87(10)  | -18.9(3)   | 1.083      | 1.0833 | 0.6879 | -18.01 | -16.34 | 15.45 |
| C(11)-C(12)                 | 1.77(5)   | -13.69(11) | 1.5219(15) | 1.5226 | 0.7369 | -12.78 | -12.12 | 11.21 |
| C(11)-H(11A)                | 1.80(9)   | -16.9(3)   | 1.091      | 1.0919 | 0.7344 | -17.57 | -17.10 | 17.72 |
| C(11)-H(11B)                | 1.81(8)   | -17.7(3)   | 1.091      | 1.0912 | 0.7394 | -17.81 | -17.06 | 17.19 |
| C(12)-H(12A)                | 1.86(9)   | -18.9(4)   | 1.091      | 1.0919 | 0.7477 | -18.69 | -18.20 | 17.97 |
| C(12)-H(12B)                | 1.75(8)   | -16.8(4)   | 1.091      | 1.0911 | 0.7896 | -18.6  | -17.93 | 19.74 |
| C(13)-H(13A)                | 1.64(10)  | -13.9(3)   | 1.091      | 1.0921 | 0.7002 | -15.06 | -14.18 | 15.34 |
| C(13)-H(13B)                | 1.80(11)  | -17.7(3)   | 1.091      | 1.0932 | 0.6118 | -15.56 | -13.07 | 10.93 |
| H(30)...O(2) <sup>i</sup>   | 0.16(6)   | 4.41(6)    | 1.76       | 1.7672 | 0.5816 | -0.82  | -0.79  | 6.01  |
| H(5A)...N(3) <sup>i</sup>   | 0.044(17) | 1.189(2)   | 2.280      | 2.3795 | 0.8638 | -0.19  | -0.14  | 1.53  |
| H(5B)...O(1) <sup>ii</sup>  | 0.073(15) | 1.383(2)   | 2.230      | 2.255  | 0.8749 | -0.29  | -0.28  | 1.95  |
| H(6A)...N(1)                | 0.092(18) | 1.639(4)   | 2.200      | 2.2335 | 1.4251 | -0.39  | -0.36  | 2.39  |
| H(6B)...O(3) <sup>iii</sup> | 0.10(3)   | 2.138(8)   | 2.051      | 2.0772 | 0.7807 | -0.49  | -0.40  | 3.02  |
| H(7A)...O(2) <sup>i</sup>   | 0.07(3)   | 1.414(5)   | 2.170      | 2.1797 | 0.8111 | -0.28  | -0.28  | 1.97  |
| H(7B)...O(1) <sup>iv</sup>  | 0.063(12) | 1.192(3)   | 2.210      | 2.287  | 0.9108 | -0.25  | -0.20  | 1.64  |
| H(4A)...N(1) <sup>v</sup>   | 0.031(19) | 0.684(4)   | 2.448      | 2.4727 | 0.9559 | -0.10  | -0.09  | 0.87  |
| H(4B)...N(2) <sup>vi</sup>  | 0.045(11) | 0.865(3)   | 2.396      | 2.4785 | 0.9766 | -0.20  | -0.13  | 1.20  |

Symmetry operations: <sup>i</sup> -x, +y, 1/2-z; <sup>ii</sup> x-1, +y, +z; <sup>iii</sup> 1/2+, y-1/2, 1/2-z; <sup>iv</sup> 1-x, +y, 1/2-z; <sup>v</sup> 1/2+x, 1/2-y, -z; <sup>vi</sup> x-1/2, 1/2-y, -z;

Table S5. Properties of bond critical points in **2**.  $\rho$  is the electron density,  $\nabla^2\rho$  is the Laplacian of the electron density in the bond critical point,  $D_{ij}$  the interatomic distance,  $R_{ij}$  the length of the bond path,  $d_1$  the distance from the first atom to the (3,-1) critical point and  $\lambda_1 - \lambda_3$  the eigenvalues of the Laplacian in the bond critical point.

| Compound <b>2</b> |                               |                                       |                      |                      |                   |             |             |             |
|-------------------|-------------------------------|---------------------------------------|----------------------|----------------------|-------------------|-------------|-------------|-------------|
| <b>Bond</b>       | $\rho(\text{e}/\text{\AA}^3)$ | $\nabla^2\rho(\text{e}/\text{\AA}^5)$ | $D_{ij}(\text{\AA})$ | $R_{ij}(\text{\AA})$ | $d_1(\text{\AA})$ | $\lambda_1$ | $\lambda_2$ | $\lambda_3$ |
| S(1)-O(1)         | 2.85(8)                       | -27.9(4)                              | 1.4310(11)           | 1.4314               | 0.6678            | -23.07      | -21.57      | 16.71       |
| S(1)-O(2)         | 2.61(7)                       | -23.5(4)                              | 1.4393(11)           | 1.4403               | 0.6624            | -23.78      | -16.88      | 17.20       |
| S(1)-N(3)         | 2.09(4)                       | -12.22(10)                            | 1.6506(8)            | 1.6512               | 0.8967            | -17.64      | -15.31      | 20.73       |
| S(1)-C(5)         | 1.57(4)                       | -7.52(11)                             | 1.7376(9)            | 1.7402               | 1.0369            | -11.00      | -9.59       | 13.06       |
| N(1)-C(1)         | 2.72(6)                       | -28.31(18)                            | 1.3446(9)            | 1.3451               | 0.7227            | -25.38      | -22.04      | 19.11       |
| N(1)-C(2)         | 2.57(6)                       | -28.0(3)                              | 1.3371(11)           | 1.3377               | 0.7560            | -22.86      | -21.02      | 15.84       |
| N(2)-C(1)         | 2.67(6)                       | -26.6(2)                              | 1.3334(11)           | 1.3337               | 0.7299            | -24.16      | -20.75      | 18.33       |
| N(2)-C(4)         | 2.51(6)                       | -22.6(3)                              | 1.3387(12)           | 1.3396               | 0.7318            | -21.28      | -19.59      | 18.30       |
| N(3)-C(1)         | 2.33(5)                       | -20.69(18)                            | 1.3805(11)           | 1.3807               | 0.7590            | -21.61      | -16.61      | 17.53       |
| N(3)-H(3A)        | 1.95(8)                       | -25.9(6)                              | 1.027                | 1.0274               | 0.8032            | -28.15      | -27.20      | 29.45       |
| N(4)-C(8)         | 2.31(6)                       | -18.96(18)                            | 1.3810(11)           | 1.3812               | 0.7576            | -19.71      | -17.26      | 18.01       |
| N(4)-H(4A)        | 2.10(10)                      | -25.1(6)                              | 1.01                 | 1.0103               | 0.7470            | -27.04      | -26.18      | 28.13       |
| N(4)-H(4B)        | 2.10(10)                      | -28.5(7)                              | 1.01                 | 1.0103               | 0.7730            | -29.13      | -28.48      | 29.13       |
| C(2)-C(3)         | 2.23(6)                       | -21.28(16)                            | 1.3928(13)           | 1.3929               | 0.7418            | -18.79      | -15.02      | 12.53       |
| C(2)-H(2)         | 1.96(8)                       | -24.3(4)                              | 1.083                | 1.0837               | 0.7606            | -21.78      | -20.40      | 17.84       |
| C(3)-C(4)         | 2.35(5)                       | -23.72(14)                            | 1.3878(13)           | 1.3879               | 0.6826            | -20.08      | -16.67      | 13.03       |
| C(3)-H(3)         | 1.85(9)                       | -19.5(4)                              | 1.083                | 1.0832               | 0.7397            | -19.23      | -17.87      | 17.56       |
| C(4)-H(4)         | 1.81(8)                       | -20.4(4)                              | 1.083                | 1.0838               | 0.7811            | -20.60      | -18.95      | 19.17       |

|                             |          |            |            |        |        |        |        |       |
|-----------------------------|----------|------------|------------|--------|--------|--------|--------|-------|
| C(5)-C(6)                   | 2.16(5)  | -18.19(13) | 1.3997(11) | 1.3997 | 0.6864 | -17.41 | -14.10 | 13.32 |
| C(5)-C(10)                  | 2.29(5)  | -21.19(14) | 1.3949(11) | 1.3960 | 0.7151 | -18.66 | -16.14 | 13.61 |
| C(6)-C(7)                   | 2.31(5)  | -22.62(14) | 1.3872(12) | 1.3874 | 0.6973 | -19.24 | -16.38 | 12.99 |
| C(6)-H(6)                   | 1.89(8)  | -19.5(3)   | 1.083      | 1.0831 | 0.7342 | -19.40 | -18.45 | 18.40 |
| C(7)-C(8)                   | 2.23(5)  | -20.60(14) | 1.4093(12) | 1.4093 | 0.6801 | -18.98 | -14.94 | 13.32 |
| C(7)-H(7)                   | 1.85(8)  | -17.3(3)   | 1.083      | 1.0830 | 0.7168 | -18.63 | -16.96 | 18.25 |
| C(8)-C(9)                   | 2.27(5)  | -21.06(14) | 1.4046(12) | 1.4047 | 0.7181 | -18.61 | -15.82 | 13.37 |
| C(9)-C(10)                  | 2.33(6)  | -21.83(14) | 1.3851(11) | 1.3851 | 0.6946 | -19.33 | -16.23 | 13.73 |
| C(9)-H(9)                   | 1.90(8)  | -17.5(3)   | 1.083      | 1.0831 | 0.6616 | -17.92 | -15.40 | 15.82 |
| C(10)-H(10)                 | 1.91(9)  | -19.2(3)   | 1.083      | 1.0834 | 0.7002 | -18.71 | -17.38 | 16.86 |
| H(3A)...N(1) <sup>i</sup>   | 0.17(4)  | 3.12(4)    | 1.895      | 1.8986 | 0.6293 | -0.95  | -0.88  | 4.95  |
| H(4B)...O(2) <sup>ii</sup>  | 0.09(5)  | 2.69(3)    | 1.972      | 1.9765 | 0.6829 | -0.38  | -0.36  | 3.43  |
| H(4A)...O(1) <sup>iii</sup> | 0.067(2) | 1.026(3)   | 2.465      | 2.5590 | 1.1527 | -0.21  | -0.19  | 1.42  |
| H(4A)...N(4) <sup>iv</sup>  | 0.018(8) | 0.481(3)   | 2.566      | 2.7071 | 1.0515 | -0.08  | -0.05  | 0.61  |

Symmetry operations: <sup>i</sup> -x, 2-y, 1-z; <sup>ii</sup> x, 5/2-y, z-1/2; <sup>iii</sup> x, 3/2-y, z-1/2; <sup>iv</sup> 1-x, y-1/2, 1/2-z

Table S6. Properties of bond critical points in **3b**.  $\rho$  is the electron density,  $\nabla^2\rho$  is the Laplacian of the electron density in the bond critical point,  $D_{ij}$  the interatomic distance,  $R_{ij}$  the length of the bond path,  $d_1$  the distance from the first atom to the (3,-1) critical point and  $\lambda_1 - \lambda_3$  the eigenvalues of the Laplacian in the bond critical point.

| Compound <b>3b</b> |                               |                                       |                      |                      |                   |             |             |             |
|--------------------|-------------------------------|---------------------------------------|----------------------|----------------------|-------------------|-------------|-------------|-------------|
| Bond               | $\rho(\text{e}/\text{\AA}^3)$ | $\nabla^2\rho(\text{e}/\text{\AA}^5)$ | $D_{ij}(\text{\AA})$ | $R_{ij}(\text{\AA})$ | $d_1(\text{\AA})$ | $\lambda_1$ | $\lambda_2$ | $\lambda_3$ |
| S(1)-O(1)          | 2.95(7)                       | -16.3(2)                              | 1.4486(9)            | 1.4488               | 0.8077            | -25.57      | -20.66      | 29.92       |
| S(1)-O(2)          | 2.89(8)                       | -23.2(4)                              | 1.4402(9)            | 1.4409               | 0.6744            | -22.31      | -20.19      | 19.34       |
| S(1)-N(3)          | 2.09(6)                       | -11.30(13)                            | 1.5986(7)            | 1.5997               | 0.8578            | -17.65      | -14.17      | 20.52       |
| S(1)-C(5)          | 1.33(4)                       | -4.24(8)                              | 1.7704(8)            | 1.7714               | 0.9691            | -8.91       | -8.21       | 12.88       |
| O(3)-C(11)         | 1.80(8)                       | -16.1(3)                              | 1.4249(16)           | 1.4278               | 0.8389            | -13.73      | -12.56      | 10.15       |
| O(3)-H(3O)         | 2.06(12)                      | -19.7(8)                              | 0.98                 | 0.9804               | 0.7551            | -29.00      | -28.66      | 37.93       |
| N(1)-C(1)          | 2.40(7)                       | -23.4(3)                              | 1.3670(9)            | 1.3673               | 0.7592            | -22.25      | -17.89      | 16.79       |
| N(1)-C(2)          | 2.41(8)                       | -27.3(3)                              | 1.3449(10)           | 1.3451               | 0.7798            | -21.84      | -18.96      | 13.55       |
| N(1)-H(1A)         | 1.83(10)                      | -27.7(8)                              | 1.027                | 1.0302               | 0.8236            | -28.03      | -27.03      | 27.41       |
| N(2)-C(1)          | 2.52(7)                       | -23.2(3)                              | 1.3444(9)            | 1.3445               | 0.7389            | -23.01      | -18.72      | 18.57       |
| N(2)-C(4)          | 2.42(8)                       | -21.5(3)                              | 1.3318(11)           | 1.3333               | 0.7553            | -20.84      | -17.38      | 16.71       |
| N(3)-C(1)          | 2.45(7)                       | -20.8(3)                              | 1.3419(10)           | 1.3421               | 0.7152            | -21.41      | -18.08      | 18.71       |
| N(4)-C(8)          | 1.77(6)                       | -12.2(3)                              | 1.4594(10)           | 1.4596               | 0.8498            | -14.13      | -12.23      | 14.18       |
| N(4)-H(4A)         | 1.89(10)                      | -27.0(7)                              | 1.036                | 1.0379               | 0.8070            | -26.57      | -26.05      | 25.58       |
| N(4)-H(4B)         | 1.87(11)                      | -29.4(8)                              | 1.036                | 1.0441               | 0.8238            | -27.31      | -27.06      | 25.00       |
| N(4)-H(4C)         | 1.88(10)                      | -26.8(7)                              | 1.036                | 1.0386               | 0.8137            | -26.81      | -26.39      | 26.44       |
| C(2)-C(3)          | 2.43(7)                       | -24.72(18)                            | 1.3750(11)           | 1.3751               | 0.7131            | -21.58      | -16.51      | 13.38       |
| C(2)-H(2)          | 2.05(12)                      | -25.1(4)                              | 1.083                | 1.0853               | 0.7205            | -21.94      | -19.46      | 16.34       |
| C(3)-C(4)          | 2.19(7)                       | -19.96(17)                            | 1.3988(11)           | 1.3991               | 0.6731            | -18.11      | -15.10      | 13.26       |
| C(3)-H(3)          | 1.84(11)                      | -16.9(4)                              | 1.083                | 1.0832               | 0.7065            | -18.44      | -16.17      | 17.66       |
| C(4)-H(4)          | 1.92(12)                      | -22.1(5)                              | 1.083                | 1.0832               | 0.7338            | -20.21      | -18.62      | 16.72       |
| C(5)-C(6)          | 2.28(6)                       | -20.38(17)                            | 1.3918(9)            | 1.3919               | 0.6693            | -19.16      | -15.39      | 14.17       |
| C(5)-C(10)         | 2.25(6)                       | -19.51(16)                            | 1.393                | 1.3934               | 0.7061            | -18.57      | -15.41      | 14.47       |

|                             |          |            |            |        |        |        |        |       |
|-----------------------------|----------|------------|------------|--------|--------|--------|--------|-------|
| C(6)-C(7)                   | 2.12(6)  | -20.38(18) | 1.3917(10) | 1.392  | 0.6449 | -17.68 | -14.51 | 11.8  |
| C(6)-H(6)                   | 1.83(9)  | -21.6(4)   | 1.083      | 1.0838 | 0.7574 | -20.03 | -18.33 | 16.71 |
| C(7)-C(8)                   | 2.37(6)  | -22.56(17) | 1.3905(10) | 1.3906 | 0.6763 | -20.37 | -16.22 | 14.03 |
| C(7)-H(7)                   | 1.95(10) | -20.5(4)   | 1.083      | 1.0832 | 0.7211 | -19.72 | -18.49 | 17.69 |
| C(8)-C(9)                   | 2.37(7)  | -24.02(19) | 1.3908(10) | 1.3912 | 0.7596 | -21.01 | -15.85 | 12.84 |
| C(9)-C(10)                  | 2.20(6)  | -21.70(17) | 1.3944(10) | 1.3948 | 0.7353 | -18.62 | -15.63 | 12.54 |
| C(9)-H(9)                   | 1.83(10) | -19.5(5)   | 1.083      | 1.083  | 0.7751 | -20.22 | -18.88 | 19.64 |
| C(10)-H(10)                 | 1.94(10) | -21.8(4)   | 1.083      | 1.0831 | 0.7537 | -20.60 | -19.61 | 18.48 |
| C(11)-H(111)                | 1.56(10) | -12.5(5)   | 1.091      | 1.097  | 0.8052 | -16.63 | -15.53 | 19.68 |
| C(11)-H(112)                | 1.51(8)  | -13.4(3)   | 1.091      | 1.1074 | 0.7088 | -13.59 | -13.30 | 13.48 |
| H(1A)...N(3) <sup>i</sup>   | 0.21(4)  | 2.47(3)    | 1.89       | 1.915  | 0.6762 | -1.19  | -1.10  | 4.76  |
| H(4A)...O(1) <sup>ii</sup>  | 0.12(5)  | 2.85(3)    | 1.89       | 1.9272 | 0.6763 | -0.64  | -0.48  | 3.96  |
| N(4)...CL(1) <sup>iii</sup> | 0.068(6) | 0.826(4)   | 3.2187(10) | 3.2555 | 1.6271 | -0.22  | -0.15  | 1.20  |
| H(4B)...CL(1)               | 0.15(4)  | 1.875(12)  | 2.19       | 2.2261 | 0.7563 | -0.79  | -0.59  | 3.25  |
| H(4C)...CL(1) <sup>iv</sup> | 0.14(4)  | 2.18(2)    | 2.15       | 2.1823 | 0.7038 | -0.76  | -0.61  | 3.56  |
| H(3O)...CL(1) <sup>iv</sup> | 0.14(4)  | 1.916(13)  | 2.23       | 2.2374 | 0.7622 | -0.62  | -0.56  | 3.09  |

Symmetry operations: <sup>i</sup> 1-x, -y, 1-z; <sup>ii</sup> 1-x, 1-y, -z; <sup>iii</sup> 1-x, 2-y, -z; <sup>iv</sup> x-1, y, z



Table S7. Integrated net charges  $q$  [e] and volumes  $V$  [ $\text{\AA}^3$ ] of the atomic basins by QTAIM partitioning for the sulfadiazine groups in **1**, **2** and **3b**.

| Atom | 1             |                              | 2             |      | 3             |                              |
|------|---------------|------------------------------|---------------|------|---------------|------------------------------|
|      | $Q_{001}$ [e] | $V_{001}$ [ $\text{\AA}^3$ ] | $Q_{001}$ [e] | Atom | $Q_{001}$ [e] | $V_{001}$ [ $\text{\AA}^3$ ] |
| S1   | 2.25          | 7.35                         | 1.59          | S1   | 2.25          | 7.35                         |
| O1   | -1.31         | 16.54                        | -1.24         | O1   | -1.31         | 16.54                        |
| O2   | -1.25         | 17.25                        | -1.20         | O2   | -1.25         | 17.25                        |
| N1   | -1.08         | 15.57                        | -0.87         | N1   | -1.08         | 15.57                        |
| N2   | -0.96         | 14.23                        | -0.94         | N2   | -0.96         | 14.23                        |
| N3   | -1.26         | 14.52                        | -1.13         | N3   | -1.26         | 14.52                        |
| N4   | -1.20         | 17.28                        | -1.16         | N4   | -1.20         | 17.28                        |
| C1   | 1.22          | 5.81                         | 0.96          | C1   | 1.22          | 5.81                         |
| C2   | 0.37          | 10.72                        | 0.30          | C2   | 0.37          | 10.72                        |
| C3   | 0.10          | 11.44                        | -0.01         | C3   | 0.10          | 11.44                        |
| C4   | 0.45          | 9.81                         | 0.25          | C4   | 0.45          | 9.81                         |
| C5   | -0.11         | 9.71                         | -0.04         | C5   | -0.11         | 9.71                         |
| C6   | 0.07          | 11.00                        | -0.07         | C6   | 0.07          | 11.00                        |
| C7   | -0.13         | 11.82                        | -0.04         | C7   | -0.13         | 11.82                        |
| C8   | 0.28          | 8.91                         | 0.27          | C8   | 0.28          | 8.91                         |
| C9   | 0.02          | 12.62                        | -0.02         | C9   | 0.02          | 12.62                        |
| C10  | -0.05         | 11.58                        | 0.03          | C10  | -0.05         | 11.58                        |
| H2   | 0.10          | 5.52                         | 0.34          | H2   | 0.10          | 5.52                         |
| H3   | -0.04         | 5.83                         | 0.33          | H3   | -0.04         | 5.83                         |
| H4   | -0.01         | 5.35                         | 0.36          | H4   | -0.01         | 5.35                         |
| H6   | 0.03          | 5.49                         | 0.22          | H6   | 0.03          | 5.49                         |
| H7   | 0.08          | 5.43                         | 0.14          | H7   | 0.08          | 5.43                         |
| H9   | 0.21          | 5.54                         | 0.08          | H9   | 0.21          | 5.54                         |
| H10  | 0.12          | 5.28                         | 0.17          | H10  | 0.12          | 5.28                         |
| H1A  |               |                              |               | H1A  |               |                              |
| H3A  |               |                              | 0.59          | H3A  |               |                              |
| H4A  | 0.58          | 2.86                         | 0.53          | H4A  | 0.58          | 2.86                         |
| H4B  | 0.57          | 2.23                         | 0.57          | H4B  | 0.57          | 2.23                         |
| H4C  |               |                              |               | H4C  |               |                              |

Fig. S1: Residual electron density after the multipole refinement of **1** with contour intervals at  $0.1 \text{ e } \text{Å}^{-3}$  in the plane of the pyrimidine (left) and the aniline (right); positive values shown in red, negative values in blue.

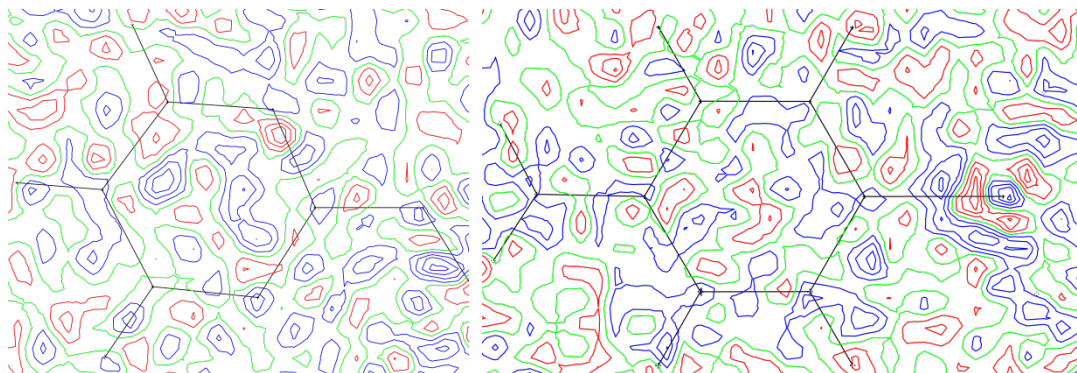

Fig. S2: Residual electron density after the multipole refinement of **2** with contour intervals at  $0.1 \text{ e } \text{Å}^{-3}$  in the plane of the pyrimidine (left) and the aniline (right); positive values shown in red, negative values in blue.

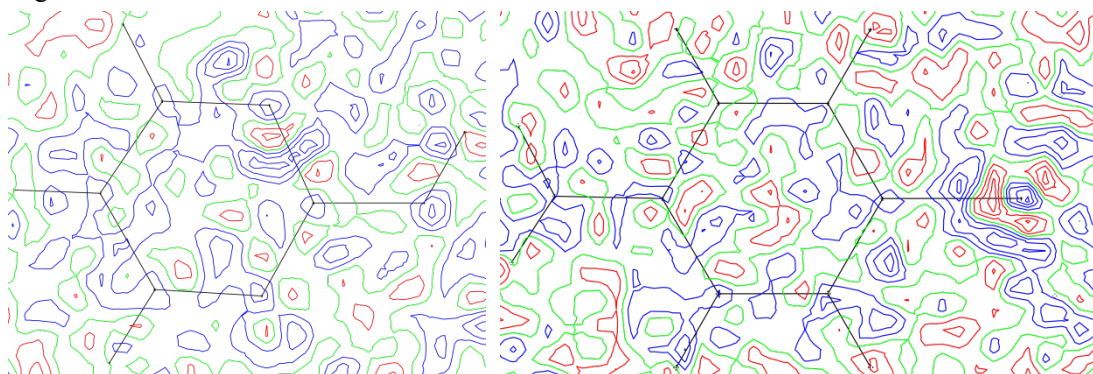

Fig. S3: Residual electron density after the multipole refinement of **3b** with contour intervals at  $0.1 \text{ e } \text{Å}^{-3}$  in the plane of the pyrimidine (left) and the aniline (right); positive values shown in red, negative values in blue.

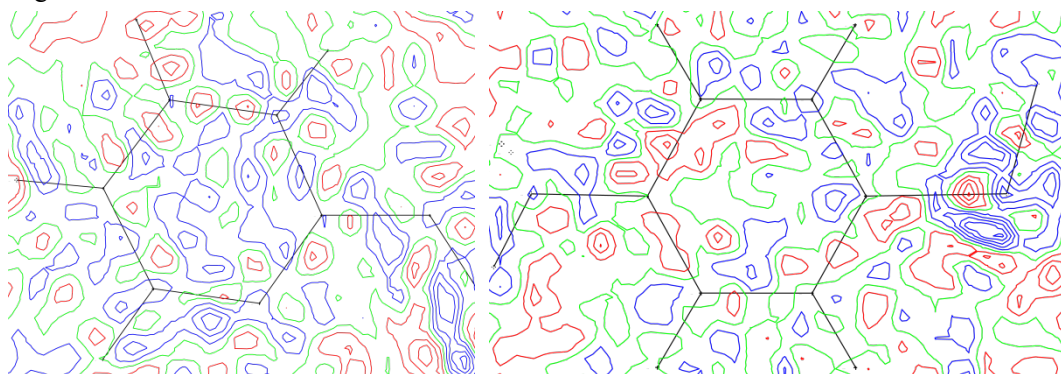

Table S8. IAM refinement results for alternative protonation patterns in **3a** and **3b**.

|                                                                              | correct assignment:<br>site I (N1) protonated | no H assigned                          | incorrect assignment:<br>site II (N3) protonated |
|------------------------------------------------------------------------------|-----------------------------------------------|----------------------------------------|--------------------------------------------------|
| <b>3a</b>                                                                    |                                               |                                        |                                                  |
| $wR2$                                                                        | 0.1220                                        | 0.1259                                 | 0.1287                                           |
| $R(\text{all})$                                                              | 0.0629                                        | 0.0635                                 | 0.0641                                           |
| $R[F^2 > 2\sigma(F^2)]$                                                      | 0.0466                                        | 0.0472                                 | 0.0478                                           |
| $\rho_{\text{max}}$ ,<br>$\rho_{\text{min}}$ ( $\text{e } \text{\AA}^{-3}$ ) | 1.02 (around S1)<br>-0.54 (around S1)         | 1.04 (around N1)<br>-0.53 (around S1)  | 1.02 (around N1)<br>-1.11 (around H3)            |
| <b>3b</b>                                                                    |                                               |                                        |                                                  |
| $wR2$                                                                        | 0.1364                                        | 0.1387                                 | 0.1423                                           |
| $R(\text{all})$                                                              | 0.0654                                        | 0.0659                                 | 0.0664                                           |
| $R[F^2 > 2\sigma(F^2)]$                                                      | 0.0497                                        | 0.0502                                 | 0.0506                                           |
| $\rho_{\text{max}}$ ,<br>$\rho_{\text{min}}$ ( $\text{e } \text{\AA}^{-3}$ ) | 1.20 (around S1),<br>-0.66 (around S1)        | 1.21 (around S1),<br>-0.67 (around S1) | 1.23 (around S1),<br>-1.20 (around H3)           |

Fig. S4: Laplacian of the experimental charge density in **3b**; positive values shown in blue. The representations are based on the correct structure model with protonated pyridine N, i.e. site I in Scheme 1, (left) and based on the alternative incorrect assumption of protonated amidic N, site II in Scheme 1, (right); note the obvious artefacts in the region of the wrongly assigned H atoms in the latter model.

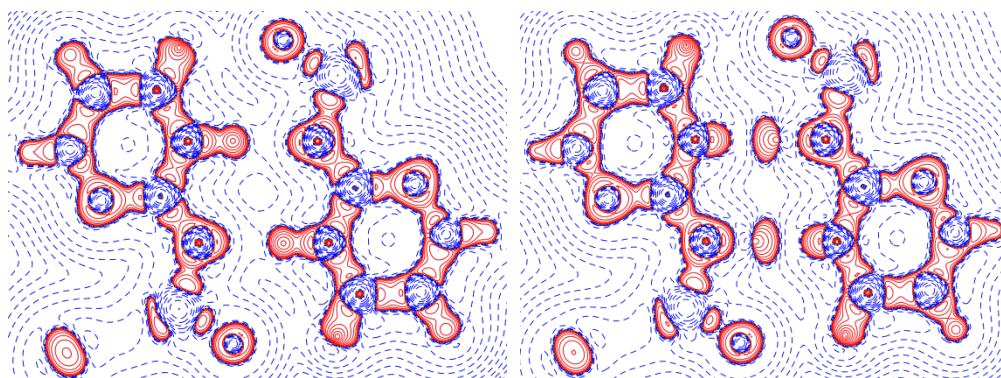

Supplement: c2ce26633d.pdf [file c2ce26633d.pdf]
